# Supplementary material
Source: HighWire-hosted journal article supplement (https://ez-admanager.com/highwire/filestream/133641/field_highwire_adjunct_files/2/Appendix_e-6.pdf)
Supplement: Appendix_e-6.pdf [file Appendix_e-6.pdf]

## Appendix e-6 Cochrane search strategy

### ID Search

- #1 ("tardive syndrome" OR "tardive syndromes" OR "tardive dyskinesia" OR "tardive dyskinesias" OR "tardive tremor" OR "tardive tremors" OR "tardive dystonia" OR "tardive tourettism" OR "tardive stereotypy" OR "tardive myoclonus" OR "classical tardive dyskinesia" OR "classical tardive dyskinesias" OR "neuroleptic-induced NEXT movement disorder" OR "neuroleptic-induced NEXT movement disorders" OR "drug-induced NEXT movement disorder" OR "drug-induced NEXT movement disorders" OR "medication-induced movement disorder" OR "medication-induced movement disorders");ti,ab,kw
- #2 ("neuroleptic discontinuation" OR "neuroleptic cessation" OR "reversibility" OR "switching antipsychotic" OR "switching antipsychotics" OR "switching neuroleptic" OR "switching neuroleptics" OR "typical antipsychotic" OR "typical antipsychotics" OR haloperidol OR chlorpromazine OR fluperlapine OR sulpiride OR thiopropazate OR molindone);ti,ab,kw
- #3 (tiapride OR clozapine OR risperidone OR olanzapine OR quetiapine OR sertindole OR aripiprazole OR ziprasidone OR zuclopenthixol OR tetrabenazine OR reserpine);ti,ab,kw
- #4 (alpha-methyl-para-tyrosine OR alpha-methyldopa OR bromocriptine OR pergolide OR piribedil OR pramipexole OR ropinirole OR levodopa OR propranolol OR anticholinergics OR donepezil OR rivastigmine OR galantamine OR tacrine);ti,ab,kw
- #5 (memantine OR deanol OR meclofenozate OR "GABA agonists" OR "GABA agonist" OR clonazepam OR diazepam OR valproate OR baclofen OR benzodiazepine OR biperiden OR "vitamin E" OR alpha-tocopherol OR "eicosapentaenoic acid" OR selegiline OR melatonin);ti,ab,kw
- #6 ("branched chain amino acid" OR "branched chain amino acids" OR amantadine OR "calcium channel antagonist" OR "calcium channel antagonists" OR nifedipine OR verapamil OR diltiazem OR buspirone OR nefazadone OR ondansetron OR naloxone);ti,ab,kw
- #7 ("calcium channel blocker" OR "calcium channel blockers" OR morphine OR cerulein OR ceruletide OR corticosteroids OR lithium OR estrogen OR levetiracetam OR piracetam OR "botulinum toxin" OR "botulinum toxins" OR "botulinum toxin A" OR "botulinum toxin B" OR pallidotomy OR thalamotomy OR "deep brain stimulation" OR biofeedback OR "electroconvulsive therapy");ti,ab,kw
- #8 (#2 OR #3 OR #4 OR #5 OR #6 OR #7)
- #9 (#1 AND #8), from 1970 to 2007
- #10 MeSH descriptor **Antipsychotic Agents** explode all trees
- #11 MeSH descriptor **Haloperidol** explode all trees
- #12 MeSH descriptor **Chlorpromazine** explode all trees
- #13 MeSH descriptor **Sulpiride** explode all trees
- #14 MeSH descriptor **Molindone** explode all trees

**Appendix e-6 Cochrane search strategy**

## Appendix e-6 Cochrane search strategy

- #15 MeSH descriptor **Tiapride** explode all trees
- #16 MeSH descriptor **Clozapine** explode all trees
- #17 MeSH descriptor **Risperidone** explode all trees
- #18 MeSH descriptor **Clopenthixol** explode all trees
- #19 MeSH descriptor **Tetrabenazine** explode all trees
- #20 MeSH descriptor **Reserpine** explode all trees
- #21 MeSH descriptor **alpha-Methyltyrosine** explode all trees
- #22 MeSH descriptor **Methyldopa**, this term only
- #23 MeSH descriptor **Bromocriptine** explode all trees
- #24 MeSH descriptor **Pergolide** explode all trees
- #25 MeSH descriptor **Piribedil** explode all trees
- #26 MeSH descriptor **Levodopa**, this term only
- #27 MeSH descriptor **Propranolol** explode all trees
- #28 MeSH descriptor **Cholinergic Antagonists** explode all trees
- #29 MeSH descriptor **Galantamine** explode all trees
- #30 MeSH descriptor **Tacrine** explode all trees
- #31 MeSH descriptor **Memantine** explode all trees
- #32 MeSH descriptor **Deanol** explode all trees
- #33 MeSH descriptor **Receptors, GABA** explode all trees
- #34 MeSH descriptor **Clonazepam** explode all trees
- #35 MeSH descriptor **Diazepam**, this term only
- #36 MeSH descriptor **Valproic Acid** explode all trees
- #37 MeSH descriptor **Baclofen** explode all trees
- #38 MeSH descriptor **Benzodiazepines** explode all trees
- #39 MeSH descriptor **Biperiden** explode all trees
- #40 MeSH descriptor **Vitamin E** explode all trees
- #41 MeSH descriptor **alpha-Tocopherol** explode all trees
- #42 MeSH descriptor **Eicosapentaenoic Acid** explode all trees
- #43 MeSH descriptor **Selegiline** explode all trees
- #44 MeSH descriptor **Melatonin** explode all trees
- #45 MeSH descriptor **Amino Acids, Branched-Chain** explode all trees
- #46 MeSH descriptor **Amantadine**, this term only
- #47 MeSH descriptor **Nifedipine** explode all trees
- #48 MeSH descriptor **Calcium Channel Blockers** explode all trees
- #49 MeSH descriptor **Verapamil**, this term only
- #50 MeSH descriptor **Diltiazem** explode all trees
- #51 MeSH descriptor **Buspirone** explode all trees
- #52 MeSH descriptor **Ondansetron** explode all trees
- #53 MeSH descriptor **Naloxone**, this term only
- #54 MeSH descriptor **Morphine**, this term only
- #55 MeSH descriptor **Caerulein** explode all trees
- #56 MeSH descriptor **Adrenal Cortex Hormones** explode all trees
- #57 MeSH descriptor **Lithium** explode all trees
- #58 MeSH descriptor **Estrogens** explode all trees

## Appendix e-6 Cochrane search strategy

- #59 MeSH descriptor **Piracetam** explode all trees
- #60 MeSH descriptor **Botulinum Toxins** explode all trees
- #61 MeSH descriptor **Pallidotomy** explode all trees
- #62 MeSH descriptor **Deep Brain Stimulation** explode all trees
- #63 MeSH descriptor **Biofeedback (Psychology)** explode all trees
- #64 MeSH descriptor **Electroconvulsive Therapy** explode all trees
- #65 (#10 OR #11 OR #12 OR #13 OR #14 OR #15 OR #16 OR #17 OR #18 OR #19 OR #20 OR #21 OR #22 OR #23 OR #24 OR #25 OR #26 OR #27 OR #28 OR #29 OR #30 OR #31 OR #32 OR #33 OR #34 OR #35 OR #36 OR #37 OR #38 OR #39 OR #40 OR #41 OR #42 OR #43 OR #44 OR #45 OR #46 OR #47 OR #48 OR #49 OR #50 OR #51 OR #52 OR #53 OR #54 OR #55 OR #56 OR #57 OR #58 OR #59 OR #60 OR #61 OR #62 OR #63 OR #64)
- #66 (#1 AND #65), from 1970 to 2007
- #67 (#9 AND NOT #66), from 1970 to 2007
-
